# Supplementary material for: New insights into the digestion and bioavailability of a high-melting-temperature solid triacylglycerol fraction in bovine milk fat
Source: Royal Society of Chemistry journal article supplement (doi:10.1039/d1fo00259g), 2021-01-01
Supplement: d1fo00259g1.pdf [file d1fo00259g1.pdf]

## Supplementary Tables and Figure

**Table S1** Ingredient and nutritional compositions of experimental diets\*

| Description                 | Nutritional Profile*              | Standard AIN-93M | Defatted AIN-93M |
|-----------------------------|-----------------------------------|------------------|------------------|
| Ingredients                 | Corn Starch                       | 46.57            | 46.57            |
|                             | Dextrin                           | 15.50            | 15.50            |
|                             | Casein-Vitamin Free               | 14.00            | 14.00            |
|                             | Sucrose                           | 10.00            | 10.00            |
|                             | Powdered Cellulose                | 5.00             | 5.00             |
|                             | Soybean Oil                       | 4.00             | 0.00             |
|                             | AIN 93M Mineral Mix               | 3.50             | 3.50             |
|                             | AIN 93M Vitamin Mix               | 1.00             | 1.00             |
|                             | Choline Bitartrate                | 0.25             | 0.25             |
|                             | L-Cystine                         | 0.18             | 0.18             |
|                             | t-Butylhydroquinone               | 0.00             | 0.00             |
|                             | Protein                           | 13.06            | 13.06            |
| Nutrition                   | Fat                               | 4.10             | 0.00             |
|                             | Fiber                             | 5.00             | 5.00             |
|                             | Carbohydrate                      | 73.80            | 73.80            |
|                             | Metabolizable Energy              | 3.83             | 3.83             |
| Fat                         | Cholesterol                       | 0.00             | 0.00             |
|                             | Linoleic Acid                     | 2.04             | 0.00             |
|                             | Linolenic Acid                    | 0.31             | 0.00             |
|                             | Arachidonic Acid                  | 0.00             | 0.00             |
|                             | Omega-3 Fatty Acids               | 0.31             | 0.00             |
|                             | Total Saturated Fatty Acids       | 0.60             | 0.00             |
|                             | Total Monounsaturated Fatty Acids | 0.88             | 0.00             |
| Polyunsaturated Fatty Acids | 2.16                              | 0.00             |                  |

\* Rats of control group were regularly administered with oral gavage at 0.8 mL/100 g of whole butterfat, and consumed water and defatted AIN-93M chows (*ad libitum*) per day. Rats of 30L and 30S groups were regularly administered with oral gavage at 0.8 mL/100 g of 30L and 30S fractions, respectively, and consumed water and defatted AIN-93M chows (*ad libitum*) per day.

**Fig. S1** Experimental scheme.

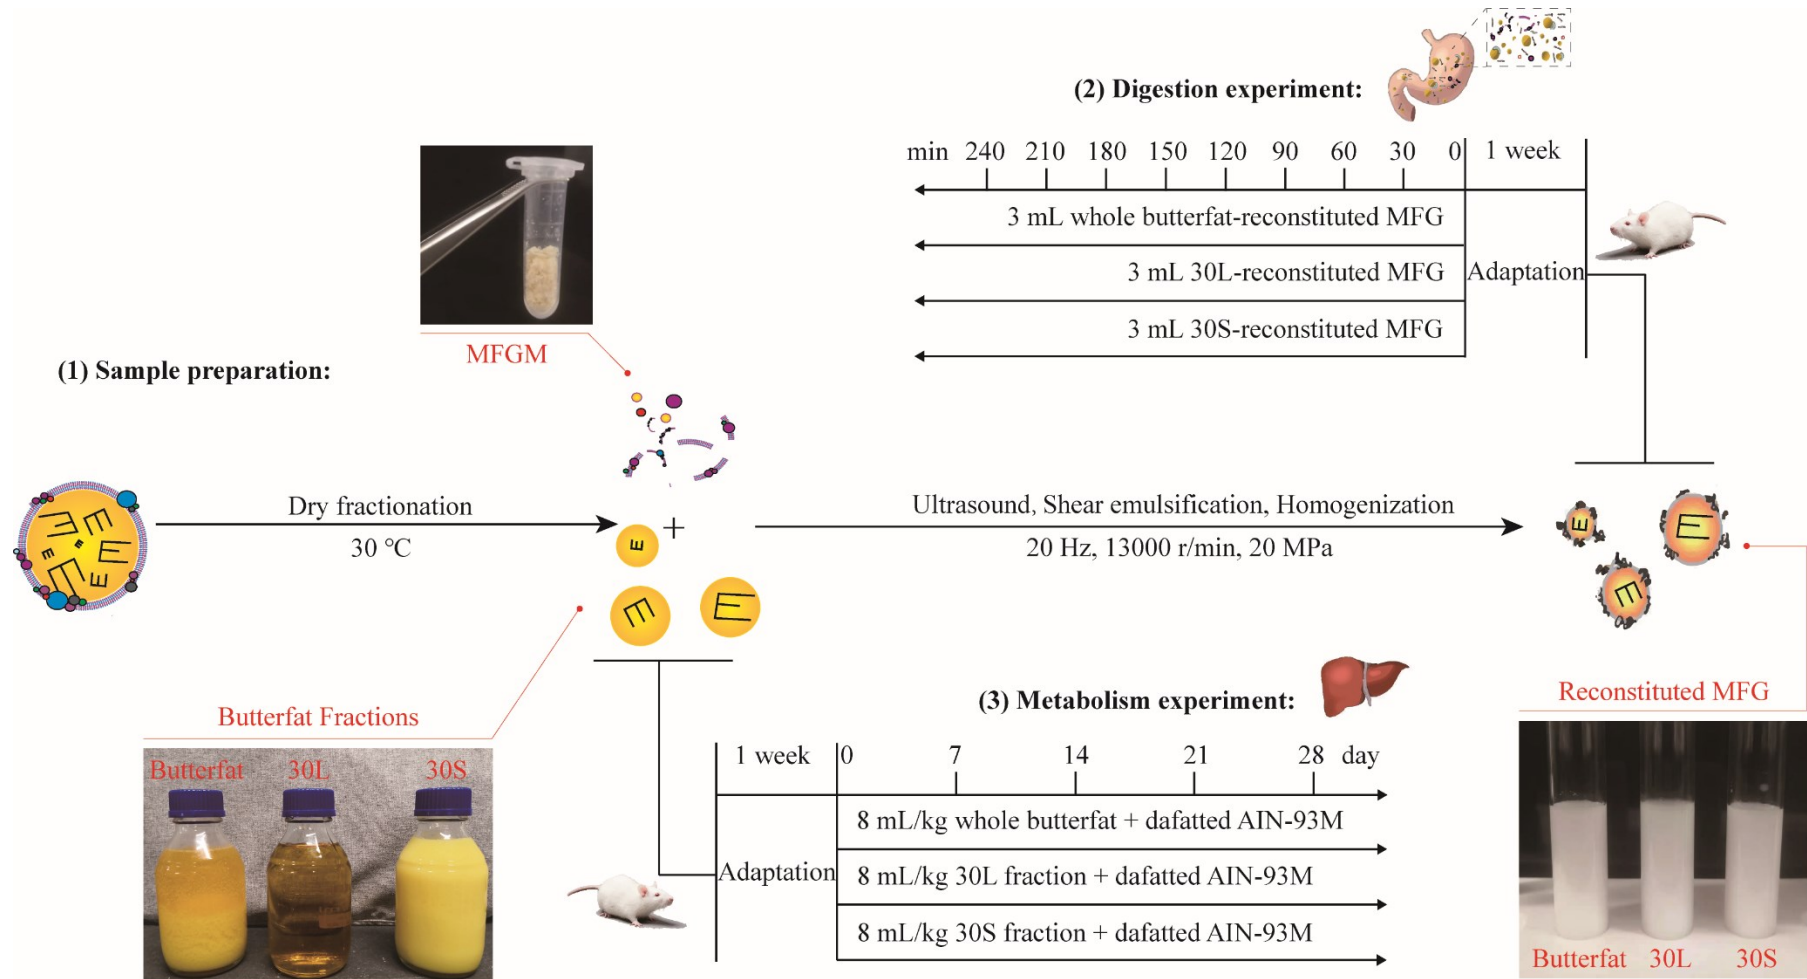

**Table S2. FA composition of whole butterfat and its fractions\***

| FA                   | Butterfat                 | Fractions                 |                           |
|----------------------|---------------------------|---------------------------|---------------------------|
|                      |                           | 30L                       | 30S                       |
| C4:0                 | 4.60 ± 0.69 <sup>a</sup>  | 3.13 ± 0.12 <sup>ab</sup> | 1.85 ± 0.16 <sup>b</sup>  |
| C6:0                 | 1.32 ± 0.22 <sup>a</sup>  | 1.15 ± 0.05 <sup>ab</sup> | 0.97 ± 0.05 <sup>b</sup>  |
| C8:0                 | 1.11 ± 0.08 <sup>a</sup>  | 1.08 ± 0.02 <sup>ab</sup> | 0.91 ± 0.02 <sup>c</sup>  |
| C10:0                | 2.97 ± 0.07 <sup>ab</sup> | 3.05 ± 0.03 <sup>a</sup>  | 2.73 ± 0.11 <sup>c</sup>  |
| C11:0                | 0.34 ± 0.02 <sup>a</sup>  | 0.34 ± 0.00 <sup>a</sup>  | 0.30 ± 0.01 <sup>b</sup>  |
| C12:0                | 3.68 ± 0.02 <sup>a</sup>  | 3.80 ± 0.06 <sup>a</sup>  | 3.69 ± 0.13 <sup>a</sup>  |
| C13:0                | 0.23 ± 0.00 <sup>a</sup>  | 0.24 ± 0.01 <sup>a</sup>  | 0.22 ± 0.01 <sup>a</sup>  |
| C14:0                | 11.27 ± 0.06 <sup>a</sup> | 11.54 ± 0.13 <sup>a</sup> | 12.15 ± 0.24 <sup>a</sup> |
| C14:1                | 0.91 ± 0.00 <sup>a</sup>  | 0.96 ± 0.01 <sup>a</sup>  | 0.81 ± 0.03 <sup>b</sup>  |
| C15:0                | 1.28 ± 0.00 <sup>ab</sup> | 1.30 ± 0.01 <sup>ab</sup> | 1.41 ± 0.02 <sup>a</sup>  |
| C16:0                | 28.39 ± 0.35 <sup>b</sup> | 28.85 ± 0.12 <sup>b</sup> | 32.56 ± 0.21 <sup>a</sup> |
| C16:1 T              | 0.52 ± 0.00 <sup>a</sup>  | ND                        | ND                        |
| C16:1                | 1.87 ± 0.12 <sup>ab</sup> | 2.04 ± 0.01 <sup>a</sup>  | 1.71 ± 0.08 <sup>ab</sup> |
| C17:0                | 0.78 ± 0.01 <sup>b</sup>  | 0.81 ± 0.03 <sup>b</sup>  | 0.90 ± 0.01 <sup>a</sup>  |
| C17:1 T              | 0.06 ± 0.00 <sup>a</sup>  | 0.07 ± 0.00 <sup>a</sup>  | 0.08 ± 0.00 <sup>a</sup>  |
| C17:1                | 0.29 ± 0.05 <sup>a</sup>  | ND                        | ND                        |
| C18:0                | 11.14 ± 0.19 <sup>b</sup> | 11.22 ± 0.07 <sup>b</sup> | 13.88 ± 0.14 <sup>a</sup> |
| C18:1 trans-9        | 0.41 ± 0.04 <sup>a</sup>  | ND                        | ND                        |
| C18:1 trans-11       | 2.89 ± 0.08 <sup>a</sup>  | 3.47 ± 0.00 <sup>a</sup>  | 3.36 ± 0.02 <sup>a</sup>  |
| C18:1 cis-6          | 0.64 ± 0.54 <sup>a</sup>  | ND                        | ND                        |
| C18:1 cis-9          | 21.55 ± 0.88 <sup>b</sup> | 23.50 ± 0.03 <sup>a</sup> | 19.55 ± 0.80 <sup>c</sup> |
| C18:1 cis11          | 0.59 ± 0.01 <sup>b</sup>  | 0.63 ± 0.02 <sup>a</sup>  | 0.55 ± 0.00 <sup>c</sup>  |
| C18:2                | 1.53 ± 0.02 <sup>a</sup>  | 1.64 ± 0.02 <sup>a</sup>  | 1.35 ± 0.02 <sup>b</sup>  |
| C20:0                | 0.12 ± 0.00 <sup>b</sup>  | 0.11 ± 0.01 <sup>b</sup>  | 0.16 ± 0.00 <sup>a</sup>  |
| C20:1                | 0.06 ± 0.01 <sup>a</sup>  | 0.05 ± 0.00 <sup>a</sup>  | ND                        |
| α-C18:3, cis-9,12,15 | 0.83 ± 0.01 <sup>a</sup>  | 0.89 ± 0.01 <sup>a</sup>  | 0.73 ± 0.01 <sup>b</sup>  |
| C20:2                | 0.03 ± 0.02 <sup>a</sup>  | ND                        | ND                        |
| C22:0                | 0.08 ± 0.03 <sup>a</sup>  | ND                        | ND                        |
| C20:3 n-6            | 0.06 ± 0.01 <sup>a</sup>  | 0.07 ± 0.00 <sup>a</sup>  | ND                        |
| C20:4 n-6            | 0.11 ± 0.01 <sup>a</sup>  | 0.10 ± 0.01 <sup>a</sup>  | 0.08 ± 0.01 <sup>a</sup>  |
| C22:2                | 0.08 ± 0.00 <sup>a</sup>  | 0.08 ± 0.00 <sup>a</sup>  | 0.09 ± 0.01 <sup>a</sup>  |
| C24:0                | 0.04 ± 0.01 <sup>a</sup>  | ND                        | ND                        |
| C20:5                | 0.14 ± 0.05 <sup>a</sup>  | 0.08 ± 0.00 <sup>a</sup>  | ND                        |
| C22:5 n-6            | 0.11 ± 0.01 <sup>a</sup>  | ND                        | ND                        |
| SFA                  | 67.34 ± 0.49 <sup>a</sup> | 66.61 ± 0.09 <sup>a</sup> | 71.73 ± 0.81 <sup>a</sup> |
| MUFA                 | 29.79 ± 0.53 <sup>a</sup> | 30.68 ± 0.02 <sup>a</sup> | 26.06 ± 0.80 <sup>a</sup> |
| PUFA                 | 2.87 ± 0.05 <sup>a</sup>  | 2.71 ± 0.09 <sup>b</sup>  | 2.21 ± 0.02 <sup>c</sup>  |
| SC-FA                | 5.93 ± 0.91 <sup>a</sup>  | 4.28 ± 0.16 <sup>ab</sup> | 2.82 ± 0.18 <sup>b</sup>  |
| MC-FA                | 8.10 ± 0.19 <sup>a</sup>  | 8.27 ± 0.07 <sup>a</sup>  | 7.63 ± 0.27 <sup>b</sup>  |
| LC-FA                | 85.98 ± 1.11 <sup>b</sup> | 87.44 ± 0.09 <sup>b</sup> | 89.55 ± 0.36 <sup>a</sup> |
| LC-SFA               | 53.32 ± 0.61 <sup>b</sup> | 54.06 ± 0.18 <sup>b</sup> | 61.28 ± 0.46 <sup>a</sup> |

\* The values were expressed as mass percent of individual FA, g/100 g (mean ± standard deviation). SFA: Saturated fatty acids; MUFA: Monounsaturated fatty acids; PUFA: Polyunsaturated fatty acids; SC-FA: Short-chain FA (C4 - C6); MC-FA: Medium-chain FA (C8 - C12); LC-FA: Long-chain FA (> C14). Different letters in the same row represent significant differences (P < 0.05). ND indicates not detected.

**Table S3** TAG composition of whole milk fat and its fractions \*

| TAG             | Control                   | Fractions                |                          |
|-----------------|---------------------------|--------------------------|--------------------------|
|                 |                           | 30L                      | 30S                      |
| C12:0C8:0C4:0   | 0.21 ± 0.05 <sup>a</sup>  | 0.14 ± 0.03 <sup>a</sup> | 0.87 ± 0.61 <sup>a</sup> |
| C12:0C6:0C6:0   | 0.22 ± 0.03 <sup>a</sup>  | 0.1 ± 0.04 <sup>a</sup>  | 0.74 ± 0.53 <sup>a</sup> |
| C10:0C8:0C6:0   | 0.14 ± 0.07 <sup>a</sup>  | 0.14 ± 0.06 <sup>a</sup> | 0.65 ± 0.38 <sup>a</sup> |
| C14:0C6:0C4:0   | 0.08 ± 0.03 <sup>ab</sup> | 0.03 ± 0.01 <sup>b</sup> | 0.14 ± 0.05 <sup>a</sup> |
| C14:1C6:0C6:0   | 0.02 ± 0.01 <sup>b</sup>  | 0.01 ± 0 <sup>c</sup>    | 0.11 ± 0.01 <sup>a</sup> |
| C14:1C8:0C4:0   | 0.03 ± 0 <sup>b</sup>     | 0.01 ± 0 <sup>b</sup>    | 0.31 ± 0.02 <sup>a</sup> |
| C12:0C10:0C4:0  | 0.46 ± 0.1 <sup>b</sup>   | 0.17 ± 0.05 <sup>b</sup> | 1.55 ± 0.23 <sup>a</sup> |
| C14:0C8:0C4:0   | 0.15 ± 0.05 <sup>b</sup>  | 0.13 ± 0.02 <sup>b</sup> | 1.49 ± 0.18 <sup>a</sup> |
| C14:0C6:0C6:0   | 0.06 ± 0 <sup>b</sup>     | 0.05 ± 0.01 <sup>b</sup> | 0.39 ± 0.01 <sup>a</sup> |
| C14:1C10:0C4:0  | 0.02 ± 0 <sup>cb</sup>    | 0.01 ± 0 <sup>b</sup>    | 0.15 ± 0.03 <sup>a</sup> |
| C16:1C8:0C4:0   | 0.01 ± 0 <sup>b</sup>     | 0.02 ± 0 <sup>b</sup>    | 0.25 ± 0.08 <sup>a</sup> |
| C14:1C8:0C6:0   | 0.03 ± 0 <sup>a</sup>     | 0.02 ± 0.01 <sup>a</sup> | 0.04 ± 0.01 <sup>a</sup> |
| C14:0C10:0C4:0  | 0.1 ± 0.05 <sup>b</sup>   | 0.15 ± 0.02 <sup>b</sup> | 1.17 ± 0.44 <sup>a</sup> |
| C16:0C8:0C4:0   | 0.07 ± 0.04 <sup>b</sup>  | 0.09 ± 0.02 <sup>b</sup> | 0.69 ± 0.51 <sup>a</sup> |
| C14:0C8:0C6:0   | 0.12 ± 0.08 <sup>b</sup>  | 0.18 ± 0.04 <sup>b</sup> | 2.05 ± 1.25 <sup>a</sup> |
| C16:0C6:0C6:0   | 0.02 ± 0 <sup>b</sup>     | 0.04 ± 0 <sup>b</sup>    | 0.69 ± 0.24 <sup>a</sup> |
| C18:1C8:0C4:0   | 0.06 ± 0.01 <sup>b</sup>  | 0.07 ± 0.02 <sup>b</sup> | 0.41 ± 0.21 <sup>a</sup> |
| C18:1C6:0C6:0   | 0.03 ± 0.01 <sup>a</sup>  | 0.02 ± 0.01 <sup>a</sup> | 0.12 ± 0.06 <sup>a</sup> |
| C15:0C10:0C4:0  | 0.02 ± 0.02 <sup>a</sup>  | 0.02 ± 0.01 <sup>a</sup> | 0.11 ± 0.03 <sup>a</sup> |
| C18:2C10:0C4:0  | 0.02 ± 0.01 <sup>b</sup>  | 0.01 ± 0 <sup>b</sup>    | 0.2 ± 0.08 <sup>a</sup>  |
| C14:0C12:0C4:0  | 0.28 ± 0.07 <sup>a</sup>  | 0.46 ± 0.01 <sup>a</sup> | 0.1 ± 0.01 <sup>a</sup>  |
| C12:0C8:0C10:0  | 0.06 ± 0 <sup>b</sup>     | 0.06 ± 0.02 <sup>b</sup> | 0.29 ± 0.12 <sup>a</sup> |
| C16:0C10:0C4:0  | 0.27 ± 0.21 <sup>a</sup>  | 0.44 ± 0.57 <sup>a</sup> | 0.04 ± 0 <sup>a</sup>    |
| C16:0C8:0C6:0   | 0.09 ± 0.01 <sup>a</sup>  | 0.12 ± 0.03 <sup>a</sup> | 0.05 ± 0.02 <sup>a</sup> |
| C18:1C10:0C4:0  | 0.12 ± 0.11 <sup>b</sup>  | 0.26 ± 0.01 <sup>a</sup> | 0.07 ± 0 <sup>b</sup>    |
| C10:0C17:0C4:0  | 0.03 ± 0.01 <sup>a</sup>  | 0.01 ± 0 <sup>a</sup>    | 0.06 ± 0 <sup>a</sup>    |
| C15:0C12:0C4:0  | 0.02 ± 0 <sup>b</sup>     | 0.02 ± 0.01 <sup>b</sup> | 0.1 ± 0.02 <sup>a</sup>  |
| C18:2C10:0C6:0  | 0.02 ± 0.01 <sup>a</sup>  | 0.02 ± 0.01 <sup>a</sup> | 0.02 ± 0 <sup>a</sup>    |
| C18:2C12:0C4:0  | 0.03 ± 0.01 <sup>a</sup>  | 0.05 ± 0.01 <sup>a</sup> | 0.05 ± 0 <sup>a</sup>    |
| C16:0C10:0C6:0  | 0.13 ± 0.1 <sup>a</sup>   | 0.32 ± 0.07 <sup>a</sup> | 0.18 ± 0.03 <sup>a</sup> |
| C14:0C14:0C4:0  | 0.91 ± 0.04 <sup>a</sup>  | 1.09 ± 0.07 <sup>a</sup> | 0.79 ± 0.31 <sup>a</sup> |
| C16:0C12:0C4:0  | 0.64 ± 0.25 <sup>a</sup>  | 0.38 ± 0.06 <sup>a</sup> | 1.49 ± 0.25 <sup>a</sup> |
| C10:0C18:0C4:0  | 0.21 ± 0.01 <sup>b</sup>  | 0.24 ± 0.01 <sup>b</sup> | 1.1 ± 0.49 <sup>a</sup>  |
| C16:1C14:0C4:0  | 0.13 ± 0.01 <sup>a</sup>  | 0.14 ± 0.01 <sup>a</sup> | 0.06 ± 0.02 <sup>a</sup> |
| C18:1C10:0C6:0  | 0.11 ± 0.04 <sup>ca</sup> | 0.1 ± 0.02 <sup>a</sup>  | 0.03 ± 0.01 <sup>a</sup> |
| C16:0C14:1C4:0  | 0.18 ± 0.14 <sup>b</sup>  | 0.45 ± 0.06 <sup>a</sup> | 0.06 ± 0.01 <sup>b</sup> |
| C18:1C12:0C4:0  | 0.25 ± 0.15 <sup>b</sup>  | 0.53 ± 0.12 <sup>a</sup> | 0.02 ± 0.01 <sup>b</sup> |
| C15:0C14:0C4:0  | 0.02 ± 0.01 <sup>a</sup>  | 0.05 ± 0.02 <sup>a</sup> | 0.05 ± 0.01 <sup>a</sup> |
| C18:2C14:0C4:0  | 0.04 ± 0.03 <sup>b</sup>  | 0.25 ± 0 <sup>a</sup>    | 0.01 ± 0 <sup>b</sup>    |
| C18:1C14:1C4:0  | 0.07 ± 0.01 <sup>a</sup>  | 0.06 ± 0 <sup>a</sup>    | 0.03 ± 0.02 <sup>a</sup> |
| C18:2C12:0C6:0  | 0.01 ± 0.01 <sup>b</sup>  | 0.2 ± 0.01 <sup>a</sup>  | 0.01 ± 0 <sup>b</sup>    |
| C16:1C14:1C6:0  | 0.14 ± 0.01 <sup>a</sup>  | 0.1 ± 0.02 <sup>a</sup>  | 0.02 ± 0.01 <sup>a</sup> |
| C16:1C15:0C4:0  | 0.03 ± 0 <sup>a</sup>     | 0.05 ± 0.03 <sup>a</sup> | 0.14 ± 0.07 <sup>a</sup> |
| C18:1C13:0C4:0  | 0.06 ± 0 <sup>a</sup>     | 0.1 ± 0.04 <sup>a</sup>  | 0.24 ± 0.04 <sup>a</sup> |
| C16:1C13:0C6:0  | 0.02 ± 0.01 <sup>a</sup>  | 0.01 ± 0 <sup>a</sup>    | 0.07 ± 0.05 <sup>a</sup> |
| C12:0C12:0C10:0 | 0.04 ± 0.03 <sup>b</sup>  | 0.35 ± 0.02 <sup>a</sup> | 0.07 ± 0.01 <sup>b</sup> |
| C10:0C18:0C6:0  | 0.01 ± 0 <sup>a</sup>     | 0.46 ± 0.06 <sup>a</sup> | 0.13 ± 0.07 <sup>a</sup> |

|                 |                           |                           |                           |
|-----------------|---------------------------|---------------------------|---------------------------|
| C14:0C8:0C12:0  | 0.05 ± 0.02 <sup>b</sup>  | 2.43 ± 0.13 <sup>a</sup>  | 0.08 ± 0.02 <sup>b</sup>  |
| C18:0C12:0C4:0  | 0.05 ± 0.02 <sup>a</sup>  | 0.11 ± 0.02 <sup>a</sup>  | 0.18 ± 0.09 <sup>a</sup>  |
| C16:0C14:0C4:0  | 0.09 ± 0.02 <sup>b</sup>  | 2.67 ± 0.03 <sup>a</sup>  | 0.26 ± 0.03 <sup>b</sup>  |
| C18:1C8:0C10:0  | 1.31 ± 0.51 <sup>b</sup>  | 2.42 ± 0.12 <sup>a</sup>  | 0.03 ± 0 <sup>c</sup>     |
| C18:1C14:0C4:0  | 1.08 ± 0.87 <sup>b</sup>  | 3.13 ± 0.15 <sup>a</sup>  | 0.1 ± 0.02 <sup>b</sup>   |
| C16:1C16:0C4:0  | 0.58 ± 0.18 <sup>b</sup>  | 1.14 ± 0.06 <sup>a</sup>  | 0.12 ± 0.01 <sup>b</sup>  |
| C18:1C12:0C6:0  | 0.18 ± 0.09 <sup>a</sup>  | 0.38 ± 0.05 <sup>a</sup>  | 0.04 ± 0.03 <sup>a</sup>  |
| C16:0C15:0C4:0  | 0.15 ± 0.05 <sup>a</sup>  | 0.35 ± 0.03 <sup>a</sup>  | 0.55 ± 0.14 <sup>a</sup>  |
| C18:1C16:1C4:0  | 0.15 ± 0.03 <sup>b</sup>  | 0.37 ± 0.07 <sup>b</sup>  | 5.82 ± 0.71 <sup>a</sup>  |
| C18:2C16:0C4:0  | 0.71 ± 0.1 <sup>a</sup>   | 1.08 ± 0.13 <sup>a</sup>  | 1.02 ± 0.3 <sup>a</sup>   |
| C15:0C18:1C4:0  | 0.09 ± 0.02 <sup>a</sup>  | 0.22 ± 0.09 <sup>a</sup>  | 0.1 ± 0.05 <sup>a</sup>   |
| C18:2C18:1C4:0  | 0.07 ± 0.06 <sup>a</sup>  | 0.21 ± 0.02 <sup>a</sup>  | 0.15 ± 0.05 <sup>a</sup>  |
| C18:2C16:1C6:0  | 0.01 ± 0 <sup>a</sup>     | 0.06 ± 0.02 <sup>a</sup>  | 0.02 ± 0.01 <sup>a</sup>  |
| C16:0C14:0C6:0  | 0.06 ± 0.05 <sup>a</sup>  | 1.12 ± 0.15 <sup>a</sup>  | 0.23 ± 0.08 <sup>a</sup>  |
| C16:0C16:0C4:0  | 0.03 ± 0.01 <sup>b</sup>  | 1.38 ± 0.07 <sup>a</sup>  | 1 ± 0.57 <sup>a</sup>     |
| C18:0C14:0C4:0  | 0.03 ± 0.02 <sup>c</sup>  | 2.99 ± 0.05 <sup>b</sup>  | 4.2 ± 0.97 <sup>a</sup>   |
| C18:1C10:0C10:0 | 0.15 ± 0.03 <sup>b</sup>  | 0.22 ± 0.08 <sup>a</sup>  | 0.08 ± 0.03 <sup>b</sup>  |
| C18:1C16:0C4:0  | 0.06 ± 0.01 <sup>a</sup>  | 0.76 ± 1.03 <sup>a</sup>  | 0.41 ± 0.23 <sup>a</sup>  |
| C18:1C14:0C6:0  | 0.3 ± 0.28 <sup>b</sup>   | 1.03 ± 0.11 <sup>a</sup>  | 0.09 ± 0.01 <sup>b</sup>  |
| C18:1C12:0C8:0  | 0.1 ± 0.05 <sup>b</sup>   | 0.2 ± 0.04 <sup>a</sup>   | 0.06 ± 0 <sup>b</sup>     |
| C18:1C18:1C4:0  | 0.39 ± 0d <sup>a</sup>    | 0.87 ± 0.04 <sup>a</sup>  | 0.21 ± 0.01 <sup>a</sup>  |
| C18:2C16:0C6:0  | 0.09 ± 0.01 <sup>a</sup>  | 0.2 ± 0.05 <sup>a</sup>   | 0.04 ± 0.02 <sup>a</sup>  |
| C17:0C18:1C4:0  | 0.06 ± 0.05 <sup>b</sup>  | 0.2 ± 0.03 <sup>a</sup>   | 0.07 ± 0.02 <sup>b</sup>  |
| C15:0C18:1C6:0  | 0.05 ± 0.03 <sup>a</sup>  | 0.03 ± 0.01 <sup>a</sup>  | 0.02 ± 0.01 <sup>a</sup>  |
| C16:0C12:0C10:0 | 0.03 ± 0.01 <sup>a</sup>  | 0.49 ± 0.14 <sup>a</sup>  | 0.11 ± 0.05 <sup>a</sup>  |
| C16:0C16:0C6:0  | 0.06 ± 0.01 <sup>b</sup>  | 1.04 ± 0.08 <sup>a</sup>  | 0.52 ± 0.14 <sup>b</sup>  |
| C16:0C18:0C4:0  | 0.02 ± 0 <sup>b</sup>     | 0.46 ± 0.13 <sup>b</sup>  | 7.11 ± 1.89 <sup>a</sup>  |
| C16:0C14:0C8:0  | 0.07 ± 0.02 <sup>c</sup>  | 1.14 ± 0.08 <sup>a</sup>  | 0.55 ± 0.13 <sup>b</sup>  |
| C18:1C12:0C10:0 | 0.27 ± 0.01 <sup>a</sup>  | 0.32 ± 0.1 <sup>a</sup>   | 0.05 ± 0.01 <sup>a</sup>  |
| C18:1C16:0C6:0  | 0.14 ± 0.12 <sup>a</sup>  | 0.81 ± 0.15 <sup>a</sup>  | 0.08 ± 0.03 <sup>a</sup>  |
| C18:0C18:1C4:0  | 0.07 ± 0.05 <sup>b</sup>  | 1.72 ± 0.15 <sup>a</sup>  | 1.22 ± 0.11 <sup>a</sup>  |
| C14:0C18:1C8:0  | 0.24 ± 0.13 <sup>ab</sup> | 0.54 ± 0.05 <sup>a</sup>  | 0.08 ± 0.02 <sup>b</sup>  |
| C18:1C18:1C6:0  | 0.18 ± 0.05 <sup>a</sup>  | 0.12 ± 0.08 <sup>b</sup>  | 0.16 ± 0.05 <sup>ab</sup> |
| C16:1C18:1C8:0  | 0.09 ± 0.02 <sup>a</sup>  | 0.05 ± 0 <sup>b</sup>     | 0.04 ± 0.03 <sup>b</sup>  |
| C14:1C18:1C10:0 | 0.13 ± 0.01 <sup>a</sup>  | 0.08 ± 0.02 <sup>b</sup>  | 0.02 ± 0.01 <sup>c</sup>  |
| C12:0C18:2C12:0 | 0.05 ± 0.01 <sup>a</sup>  | 0.05 ± 0.01 <sup>ab</sup> | 0.02 ± 0 <sup>b</sup>     |
| C14:0C18:2C10:0 | 0.13 ± 0 <sup>b</sup>     | 0.08 ± 0.01 <sup>c</sup>  | 0.31 ± 0.02 <sup>a</sup>  |
| C18:1C17:0C6:0  | 0.06 ± 0.01 <sup>a</sup>  | 0.12 ± 0.03 <sup>a</sup>  | 0.11 ± 0 <sup>a</sup>     |
| C18:1C15:0C8:0  | 0.11 ± 0.01 <sup>a</sup>  | 0.03 ± 0 <sup>b</sup>     | 0.06 ± 0.01 <sup>b</sup>  |
| C16:0C14:0C10:0 | 0.03 ± 0.01 <sup>b</sup>  | 1.19 ± 0.05 <sup>a</sup>  | 0.35 ± 0.04 <sup>b</sup>  |
| C18:0C16:0C6:0  | 0.08 ± 0.02 <sup>b</sup>  | 1.07 ± 0.12 <sup>a</sup>  | 1.39 ± 0.22 <sup>a</sup>  |
| C16:0C12:0C12:0 | 0.02 ± 0 <sup>b</sup>     | 0.53 ± 0.11 <sup>a</sup>  | 0.36 ± 0.02 <sup>ab</sup> |
| C16:0C16:0C8:0  | 0.03 ± 0 <sup>b</sup>     | 1.37 ± 0.07 <sup>a</sup>  | 0.37 ± 0.05 <sup>b</sup>  |
| C14:0C14:1C14:0 | 0.02 ± 0 <sup>c</sup>     | 0.89 ± 0.09 <sup>a</sup>  | 0.32 ± 0 <sup>b</sup>     |
| C18:1C14:0C10:0 | 0.01 ± 0 <sup>c</sup>     | 0.86 ± 0.09 <sup>a</sup>  | 0.22 ± 0.03 <sup>b</sup>  |
| C16:0C8:0C18:1  | 0.02 ± 0.01 <sup>c</sup>  | 0.96 ± 0.09 <sup>a</sup>  | 0.27 ± 0 <sup>b</sup>     |
| C12:0C18:1C12:0 | 0.07 ± 0.02 <sup>ab</sup> | 0.24 ± 0.02 <sup>a</sup>  | 0.04 ± 0 <sup>c</sup>     |
| C15:0C10:0C16:0 | 0.08 ± 0.02 <sup>a</sup>  | 0.14 ± 0.02 <sup>a</sup>  | 0.08 ± 0.02 <sup>a</sup>  |
| C14:0C10:0C17:0 | 0.06 ± 0.02 <sup>ba</sup> | 0.1 ± 0.01 <sup>a</sup>   | 0.11 ± 0.02 <sup>a</sup>  |
| C15:0C8:0C18:0  | 0.02 ± 0.02 <sup>a</sup>  | 0.03 ± 0.01 <sup>a</sup>  | 0.05 ± 0 <sup>a</sup>     |

|                  |                           |                           |                          |
|------------------|---------------------------|---------------------------|--------------------------|
| C18:1C8:0C18:1   | 0.02 ± 0.01 <sup>c</sup>  | 0.82 ± 0.03 <sup>a</sup>  | 0.19 ± 0.05 <sup>b</sup> |
| C10:0C15:0C18:1  | 0.02 ± 0 <sup>c</sup>     | 0.12 ± 0.02 <sup>a</sup>  | 0.07 ± 0 <sup>b</sup>    |
| C8:0C17:0C18:1   | 0.02 ± 0 <sup>b</sup>     | 0.02 ± 0.01 <sup>b</sup>  | 0.04 ± 0.02 <sup>a</sup> |
| C16:0C12:0C18:3  | 0.02 ± 0 <sup>c</sup>     | 0.02 ± 0.01 <sup>b</sup>  | 0.04 ± 0.01 <sup>a</sup> |
| C16:0C12:0C14:0  | 0.06 ± 0.01 <sup>c</sup>  | 1.8 ± 0.08 <sup>a</sup>   | 0.58 ± 0.04 <sup>b</sup> |
| C16:0C10:0C16:0  | 0.05 ± 0.01 <sup>b</sup>  | 2.42 ± 0.08 <sup>a</sup>  | 0.47 ± 0.07 <sup>b</sup> |
| C16:0C10:0C18:1  | 0.02 ± 0 <sup>c</sup>     | 1.77 ± 0.1 <sup>a</sup>   | 0.39 ± 0.01 <sup>b</sup> |
| C14:1C14:0C18:1  | 0.85 ± 0.01 <sup>a</sup>  | 0.78 ± 0.09 <sup>ab</sup> | 0.18 ± 0.06 <sup>b</sup> |
| C14:0C14:0C18:2  | 0.11 ± 0 <sup>a</sup>     | 0.17 ± 0.01 <sup>a</sup>  | 0.23 ± 0.07 <sup>a</sup> |
| C16:0C12:0C18:2  | 0.05 ± 0.01 <sup>b</sup>  | 0.15 ± 0.03 <sup>a</sup>  | 0.03 ± 0.01 <sup>b</sup> |
| C18:0C10:0C18:2  | 0.25 ± 0 <sup>a</sup>     | 0.25 ± 0.04 <sup>a</sup>  | 0.13 ± 0.02 <sup>a</sup> |
| C17:0C10:0C18:1  | 0.04 ± 0 <sup>b</sup>     | 0.04 ± 0.01 <sup>ab</sup> | 0.03 ± 0 <sup>a</sup>    |
| C15:0C12:0C18:1  | 0.01 ± 0 <sup>b</sup>     | 0.1 ± 0 <sup>a</sup>      | 0.05 ± 0.02 <sup>a</sup> |
| C16:0C14:0C18:3  | 0.03 ± 0 <sup>b</sup>     | 0.02 ± 0 <sup>b</sup>     | 0.04 ± 0.01 <sup>a</sup> |
| C14:0C14:0C16:0  | 0.01 ± 0.01 <sup>c</sup>  | 2.2 ± 0.02 <sup>a</sup>   | 1.13 ± 0.23 <sup>b</sup> |
| C18:0C10:0C16:0  | 0.13 ± 0.05 <sup>c</sup>  | 1.19 ± 0.07 <sup>b</sup>  | 4.15 ± 0.09 <sup>a</sup> |
| C16:0C12:0C18:1  | 0.02 ± 0 <sup>b</sup>     | 1.48 ± 0.08 <sup>a</sup>  | 0.13 ± 0 <sup>b</sup>    |
| C14:0C16:1C16:0  | 0.02 ± 0 <sup>b</sup>     | 1.77 ± 0.08 <sup>a</sup>  | 0.05 ± 0.01 <sup>b</sup> |
| C18:0C10:0C18:1  | 0.08 ± 0.02 <sup>c</sup>  | 0.5 ± 0.12 <sup>b</sup>   | 1.4 ± 0.07 <sup>a</sup>  |
| C16:0C14:0C18:2  | 0.02 ± 0.01 <sup>c</sup>  | 0.18 ± 0.02 <sup>b</sup>  | 0.3 ± 0.03 <sup>a</sup>  |
| C16:0C14:1C18:1  | 0.02 ± 0 <sup>b</sup>     | 0.32 ± 0.06 <sup>a</sup>  | 0.19 ± 0.05 <sup>a</sup> |
| C15:0C14:0C18:1  | 0.01 ± 0 <sup>c</sup>     | 0.22 ± 0.04 <sup>a</sup>  | 0.19 ± 0.02 <sup>b</sup> |
| C18:1C14:0C18:2  | 0.01 ± 0.01 <sup>b</sup>  | 0.39 ± 0.02 <sup>a</sup>  | 0.08 ± 0.01 <sup>c</sup> |
| C16:0C16:1C18:2  | 0.03 ± 0 <sup>a</sup>     | 0.06 ± 0.01 <sup>a</sup>  | 0.07 ± 0.05 <sup>a</sup> |
| C16:0C14:0C16:0  | 0.03 ± 0.02 <sup>b</sup>  | 1.74 ± 0.1 <sup>a</sup>   | 1.98 ± 0.09 <sup>a</sup> |
| C18:0C12:0C16:0  | 0.15 ± 0.05 <sup>c</sup>  | 1.06 ± 0.08 <sup>b</sup>  | 5.12 ± 0.27 <sup>a</sup> |
| C16:0C18:2C18:2  | 0.03 ± 0 <sup>c</sup>     | 0.18 ± 0.01 <sup>a</sup>  | 0.08 ± 0.03 <sup>b</sup> |
| C16:0C14:0C18:1  | 0.01 ± 0 <sup>c</sup>     | 2.15 ± 0.1 <sup>a</sup>   | 0.43 ± 0.03 <sup>b</sup> |
| C18:0C12:0C18:1  | 0.05 ± 0 <sup>c</sup>     | 0.81 ± 0.06 <sup>a</sup>  | 0.35 ± 0.02 <sup>b</sup> |
| C16:0C14:1C18:0  | 0.01 ± 0 <sup>c</sup>     | 0.79 ± 0.1 <sup>a</sup>   | 0.27 ± 0.05 <sup>b</sup> |
| C18:1C14:0C18:1  | 0.02 ± 0.01 <sup>c</sup>  | 1.16 ± 0.1 <sup>a</sup>   | 0.2 ± 0.04 <sup>b</sup>  |
| C16:0C16:1C18:1  | 0.01 ± 0.01 <sup>c</sup>  | 0.43 ± 0.07 <sup>a</sup>  | 0.18 ± 0.1 <sup>b</sup>  |
| C16:0C15:0C18:1  | 0.01 ± 0 <sup>b</sup>     | 0.39 ± 0.03 <sup>a</sup>  | 0.36 ± 0.09 <sup>a</sup> |
| C18:1C16:0C18:2  | 1.44 ± 0.03 <sup>a</sup>  | 0.77 ± 0.06 <sup>b</sup>  | 0.38 ± 0.08 <sup>b</sup> |
| C18:0C14:0C16:0  | 2.78 ± 0.06 <sup>a</sup>  | 0.89 ± 0.02 <sup>b</sup>  | 3.83 ± 0.35 <sup>a</sup> |
| C16:0C16:0C18:1  | 28.27 ± 0.44 <sup>a</sup> | 11.44 ± 0.88 <sup>b</sup> | 0.99 ± 0.06 <sup>c</sup> |
| C14:0C18:0C18:1  | 5.59 ± 0.08 <sup>ab</sup> | 2.67 ± 0.05 <sup>b</sup>  | 4.38 ± 0.53 <sup>a</sup> |
| C16:0C18:1C18:1  | 8.93 ± 0.16 <sup>a</sup>  | 4.05 ± 0.16 <sup>b</sup>  | 0.39 ± 0.02 <sup>c</sup> |
| C16:1C18:0C18:1  | 20.41 ± 0.34 <sup>a</sup> | 7.32 ± 0.19 <sup>b</sup>  | 0.77 ± 0.09 <sup>b</sup> |
| C16:0C17:0C18:1  | 0.33 ± 0.05 <sup>a</sup>  | 0.21 ± 0.03 <sup>b</sup>  | 0.1 ± 0.04 <sup>b</sup>  |
| C18:1C18:1C18:1  | 2.19 ± 0.02 <sup>a</sup>  | 1.15 ± 0.12 <sup>b</sup>  | 0.88 ± 0.23 <sup>c</sup> |
| C18:0C18:2C18:1  | 0.19 ± 0.03 <sup>b</sup>  | 0.09 ± 0.05 <sup>b</sup>  | 0.91 ± 0.34 <sup>a</sup> |
| C16:0C18:0C16:0  | 3.16 ± 0.01 <sup>b</sup>  | 0.06 ± 0.03 <sup>c</sup>  | 9.2 ± 0.57 <sup>a</sup>  |
| C18:0C18:0C14:0  | 0.37 ± 0.02 <sup>b</sup>  | 0.01 ± 0 <sup>c</sup>     | 1.86 ± 0.08 <sup>a</sup> |
| C18:0C16:0C18:1  | 7.69 ± 0.21 <sup>a</sup>  | 0.07 ± 0 <sup>b</sup>     | 6.21 ± 0.57 <sup>a</sup> |
| C18:0C16:0C18:0  | 0.73 ± 0.54 <sup>a</sup>  | 0.02 ± 0.01 <sup>b</sup>  | 0.92 ± 0.09 <sup>a</sup> |
| C18:1C18:0C18:1  | 1.63 ± 0.01 <sup>b</sup>  | 0.02 ± 0 <sup>c</sup>     | 2.91 ± 0.07 <sup>a</sup> |
| C18:0C18:1C18:0  | 0.5 ± 0 <sup>a</sup>      | 0.01 ± 0.01 <sup>b</sup>  | 0.38 ± 0.04 <sup>a</sup> |
| C18:0C18:0C18:0  | 0.06 ± 0.03 <sup>b</sup>  | 0.02 ± 0.02 <sup>b</sup>  | 0.4 ± 0.09 <sup>a</sup>  |
| MCFA, MCFA, SCFA | 0.80 ± 0.03 <sup>b</sup>  | 0.45 ± 0.10 <sup>b</sup>  | 3.07 ± 0.76 <sup>a</sup> |

|                  |                           |                           |                           |
|------------------|---------------------------|---------------------------|---------------------------|
| MCFA, SCFA, SCFA | 0.22 ± 0.03 <sup>a</sup>  | 0.10 ± 0.04 <sup>a</sup>  | 0.74 ± 0.53 <sup>a</sup>  |
| LCFA, SCFA, SCFA | 0.17 ± 0.03 <sup>b</sup>  | 0.08 ± 0.01 <sup>c</sup>  | 0.65 ± 0.07 <sup>a</sup>  |
| LCFA, MCFA, SCFA | 2.86 ± 0.58 <sup>a</sup>  | 4.14 ± 0.77 <sup>a</sup>  | 10.08 ± 1.80 <sup>a</sup> |
| LCFA, LCFA, SCFA | 6.46 ± 2.03 <sup>b</sup>  | 25.88 ± 1.12 <sup>a</sup> | 26.64 ± 1.58 <sup>a</sup> |
| MCFA, LCFA, SCFA | 0.25 ± 0.02 <sup>b</sup>  | 0.71 ± 0.05 <sup>ab</sup> | 1.29 ± 0.56 <sup>a</sup>  |
| MCFA, MCFA, MCFA | 0.10 ± 0.04 <sup>b</sup>  | 2.79 ± 0.12 <sup>a</sup>  | 0.16 ± 0.04 <sup>b</sup>  |
| LCFA, MCFA, MCFA | 1.68 ± 0.53 <sup>b</sup>  | 3.82 ± 0.25 <sup>a</sup>  | 0.83 ± 0.20 <sup>c</sup>  |
| LCFA, LCFA, MCFA | 0.84 ± 0.16 <sup>c</sup>  | 5.34 ± 0.16 <sup>a</sup>  | 2.00 ± 0.16 <sup>b</sup>  |
| MCFA, LCFA, MCFA | 0.11 ± 0.03 <sup>b</sup>  | 0.29 ± 0.02 <sup>a</sup>  | 0.06 ± 0.00 <sup>b</sup>  |
| LCFA, MCFA, LCFA | 1.03 ± 0.11 <sup>b</sup>  | 13.64 ± 0.25 <sup>a</sup> | 13.58 ± 0.22 <sup>a</sup> |
| MCFA, LCFA, LCFA | 0.01 ± 0.00 <sup>a</sup>  | 0.14 ± 0.03 <sup>a</sup>  | 0.12 ± 0.01 <sup>a</sup>  |
| LCFA, LCFA, LCFA | 85.48 ± 1.99 <sup>a</sup> | 42.62 ± 0.87 <sup>b</sup> | 40.79 ± 0.36 <sup>b</sup> |
| STAG             | 12.85 ± 1.22 <sup>c</sup> | 35.28 ± 0.48 <sup>b</sup> | 62.17 ± 1.62 <sup>a</sup> |
| MUTAG            | 48.63 ± 1.62 <sup>a</sup> | 42.53 ± 0.80 <sup>b</sup> | 21.47 ± 0.21 <sup>c</sup> |
| PUTAG            | 38.52 ± 0.40 <sup>a</sup> | 22.18 ± 0.33 <sup>b</sup> | 16.36 ± 1.41 <sup>c</sup> |
| MLC-TAG          | 3.67 ± 0.55 <sup>c</sup>  | 23.22 ± 0.22 <sup>a</sup> | 16.59 ± 0.17 <sup>b</sup> |
| LC-TAG           | 85.48 ± 1.99 <sup>a</sup> | 42.62 ± 0.87 <sup>b</sup> | 40.79 ± 0.36 <sup>b</sup> |
| LC-STAG          | 7.14 ± 0.66 <sup>b</sup>  | 4.93 ± 0.17 <sup>c</sup>  | 19.32 ± 0.87 <sup>a</sup> |

\* The values present the mole percentage (mol%) of each TAG species relative to the total TAG (mean ± standard deviation); different letters in the same row represent significant differences ( $P < 0.05$ ); ND means Not detected. STAG: Saturated triacylglycerols, MUTAG: Monounsaturated triacylglycerols, PUTAG: Polyunsaturated triacylglycerols, MLC-TAG: Medium- and long-chain triacylglycerols, LC-TAG: long-chain triacylglycerols, LC-STAG: long-chain saturated triacylglycerols.

**Table S4** The melting parameters of butterfat and its fractions \*

| Fractions | Temperature T <sub>peak</sub> (°C) |                           |                           | T <sub>endset</sub> (°C)  | Enthalpy ΔH <sub>f</sub> (J/g) |                           |                           | Total melting ΔH (J/g)    |
|-----------|------------------------------------|---------------------------|---------------------------|---------------------------|--------------------------------|---------------------------|---------------------------|---------------------------|
|           | 1st peak                           | 2nd peak                  | 3rd peak                  |                           | 1st peak                       | 2nd peak                  | 3rd peak                  |                           |
| Butterfat | 14.24 ± 0.03 <sup>a</sup>          | 18.34 ± 0.13 <sup>a</sup> | 31.01 ± 0.09 <sup>b</sup> | 35.23 ± 0.41 <sup>b</sup> | 12.01 ± 0.30 <sup>a</sup>      | 15.46 ± 0.48 <sup>b</sup> | 26.14 ± 0.59 <sup>b</sup> | 53.61 ± 1.36 <sup>b</sup> |
| 30L       | 11.25 ± 0.45 <sup>b</sup>          | 15.15 ± 0.16 <sup>b</sup> | 28.16 ± 0.62 <sup>c</sup> | 32.99 ± 0.33 <sup>c</sup> | 5.52 ± 0.06 <sup>b</sup>       | 7.44 ± 0.30 <sup>c</sup>  | 13.82 ± 0.45 <sup>c</sup> | 26.79 ± 0.80 <sup>c</sup> |
| 30S       | —                                  | 13.31 ± 0.12 <sup>c</sup> | 38.68 ± 0.47 <sup>a</sup> | 42.07 ± 0.14 <sup>a</sup> | —                              | 18.31 ± 0.25 <sup>a</sup> | 53.23 ± 1.79 <sup>a</sup> | 71.54 ± 2.05 <sup>a</sup> |

\* ΔH<sub>f</sub>: Enthalpy of endothermic event; T<sub>peak</sub>: Peak melting temperature; T<sub>endset</sub>: Final melting temperature. Results are represented as the mean ± standard deviation (n=3), different letters in the same column represent significant differences (P < 0.05).
